# Supplementary material for: Influence of Contacts and Applied Voltage on a Structure of a Single GaN Nanowire
Source: MDPI journal article supplement (doi:10.3390/app11209419), 2021-10-11
Supplement: s1 [file s1]

Archive with 1 entries (1 files):
- applsci-1369035-supplementary.pdf
